# Supplementary material for: A tetrahedral DNA nanostructure-decorated electrochemical platform for simple and ultrasensitive EGFR genotyping of plasma ctDNA
Source: Royal Society of Chemistry journal article supplement (doi:10.1039/d0an00591f), 2020-01-01
Supplement: d0an00591f1.pdf [file d0an00591f1.pdf]

## Supporting Information

### **Tetrahedral DNA Nanostructure-decorated Electrochemical Platform for Simple and Ultrasensitive EGFR Genotyping of Plasma ctDNA**

Xuyao Wang,<sup>†,\*</sup> Jianping Wu,<sup>‡</sup> Weilin Mao,<sup>‡</sup> Xia He,<sup>§</sup> Liming Ruan,<sup>†</sup> Junlan Zhu,<sup>†</sup> Peng Shu,<sup>†</sup> Zhenqi Zhang,<sup>†</sup> Bitao Jiang<sup>†</sup> and Xingguo Zhang<sup>†,\*</sup>

<sup>†</sup> Precision Medicine Center, Beilun People's Hospital, Zhejiang University School of Medicine First Affiliated Hospital Beilun Branch, Ningbo, Zhejiang, 315806, P. R. China

<sup>‡</sup> Department of Clinical Laboratory, Zhejiang University School of Medicine First Affiliated Hospital, Hangzhou, Zhejiang, 310003, P. R. China

<sup>§</sup> Department of Clinical Laboratory, Shengzhou People's Hospital, Zhejiang University School of Medicine First Affiliated Hospital Shengzhou Branch, Shengzhou, Zhejiang, 312400, P. R. China

#### **Corresponding Author**

\*E-mail: zhxgblhospital@163.com. E-mail: xuyaowang22@qq.com

#### **Contents**

Table of the sequences used. Photograph of SPE used. Additional data and figures of the assay.

**Table S1.** Sequences of the DNA oligonucleotides employed in this study.

| Name       | Sequence (from 5' to 3')                                                                                        | Remarks                                                                                                        |
|------------|-----------------------------------------------------------------------------------------------------------------|----------------------------------------------------------------------------------------------------------------|
| Tetra-B    | SH-C <sub>6</sub> -<br>TATCACCAGGCAGTTGACAGTGTAGCAAG<br>CTGTAATAGATGCGAGGGTCCAATAC                              | The sequence to form the scaffold of the tetrahedron                                                           |
| Tetra-C    | SH-C <sub>6</sub> -<br>TCAACTGCCTGGTGATAAAACGACACTACG<br>TGGGAATCTACTATGGCGGCTCTTC                              | The sequence to form the scaffold of the tetrahedron                                                           |
| Tetra-D    | SH-C <sub>6</sub> –<br>TTCAGACTTAGGAATGTGCTTCCCACGTAG<br>TGTCGTTTGTATTGGACCCTCGCAT                              | The sequence to form the scaffold of the tetrahedron                                                           |
| Tetra-2A19 | ACATTCCTAAGTCTGAAACATTACAGCTTG<br>CTACACGAGAAGAGCCGCCATAGTATTTTT<br>TTTTTGGATCCCAGAAGGTGAGAAAGTTAA<br>AATTCCCGT | The sequence to form the scaffold of the tetrahedron with a pendant probe complementary to exon 19 target      |
| Tetra-2A21 | ACATTCCTAAGTCTGAAACATTACAGCTTG<br>CTACACGAGAAGAGCCGCCATAGTATTTTT<br>TTTTTAAACACCGCAGCATGTCAAGATCAC<br>AGATTTTGG | The sequence to form the scaffold of the tetrahedron with a pendant probe complementary to exon 21 target      |
| Tetra-3A   | TTCCCCACGAGGGCTTCAACTCTATTTTTT<br>TTTACATTCCTAAGTCTGAAACATTACAGCT<br>TGCTACACGAGAAGAGCCGCCATAGTA                | The sequence to form the scaffold of the tetrahedron with a pendant probe complementary to the assistant probe |
| 19ass      | TAGAGTTGAAGCCCTCGTGGGGAATTGGA<br>TCCCAGAAGGTGAGAAAGTTAAATTCCC<br>GT                                             | Complementary to exon 19 and Tetra-3A                                                                          |
| 21ass      | TAGAGTTGAAGCCCTCGTGGGGAATTAAA<br>CACCGCAGCATGTCAAGATCACAGATTTTG<br>G                                            | Complementary to exon 21 and Tetra-3A                                                                          |
| 19AntiT    | TTAACGTCTTCCTTCTCTCTGTCATAGGG<br>ACTCTGGATCCCAGAAGGTGAGAAAGTTA<br>AAATTCCCGTCGCTATCAAAACATCTCCGA<br>AAGCCAACA   | Anti-target sequence of exon 19                                                                                |
| 21AntiT    | GTCGCTTGGTGCACCGCGACCTGGCAGCC<br>AGGAACGTACTGGTGAAAACACCGCAGCA<br>TGTCAGATCACAGATTTTGGGCGGACCA<br>AACTGCTGGGTG  | Anti-target sequence of exon 21, the red nucleotide is adjusted to fit 21MR                                    |
| 19F        | TGCCAGTTAACGTCTTCCTTC                                                                                           | Forward primer                                                                                                 |
| 19F2       | TGCCAGTTAACGTCTTCCTTC                                                                                           | An extra nucleotide was added to fix the T <sub>m</sub> . Labeled in red.                                      |

|       |                                        |                                                                                              |
|-------|----------------------------------------|----------------------------------------------------------------------------------------------|
| 19WR  | Biotin-GGCTTTCGGAGATGTTGCTTCTC         | Complementary to wild type                                                                   |
| 19MR1 | Biotin-TGTTGGCTTTCGGAGATGTT <b>TTG</b> | Complementary to mutated type. Three nucleotides were appended at the split. Labeled in red. |
| 19MR2 | Biotin-GGCTTTCGGAGATGTT <b>TTGATAG</b> | Complementary to mutated type. Seven nucleotides were appended at the split. Labeled in red. |
| 21F   | GCATGAACTACTTGGAGGAC                   | Forward primer                                                                               |
| 21F2  | <b>G</b> GCATGAACTACTTGGAGGAC          | An extra nucleotide was added to fix the Tm. Labeled in red                                  |
| 21WR  | Biotin-CACCCAGCAGTTTGGTCA              | Complementary to wild type                                                                   |
| 21MR1 | Biotin-CACCCAGCAGTTTGG <b>TCC</b>      | Complementary to mutated type, with an extra mismatch at -2 position. Labeled in red.        |
| 21MR2 | Biotin-CACCCAGCAGTTTGGCCC              | Complementary to mutated type                                                                |

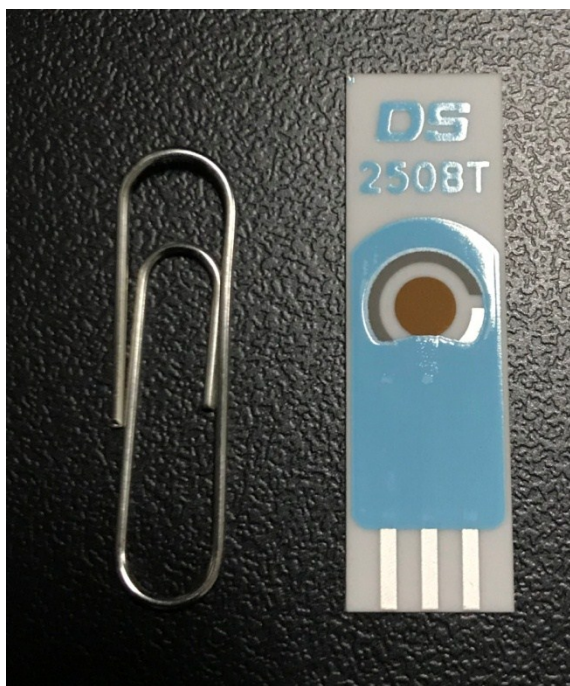

**Figure S1.** Photograph of SPE used in this platform.

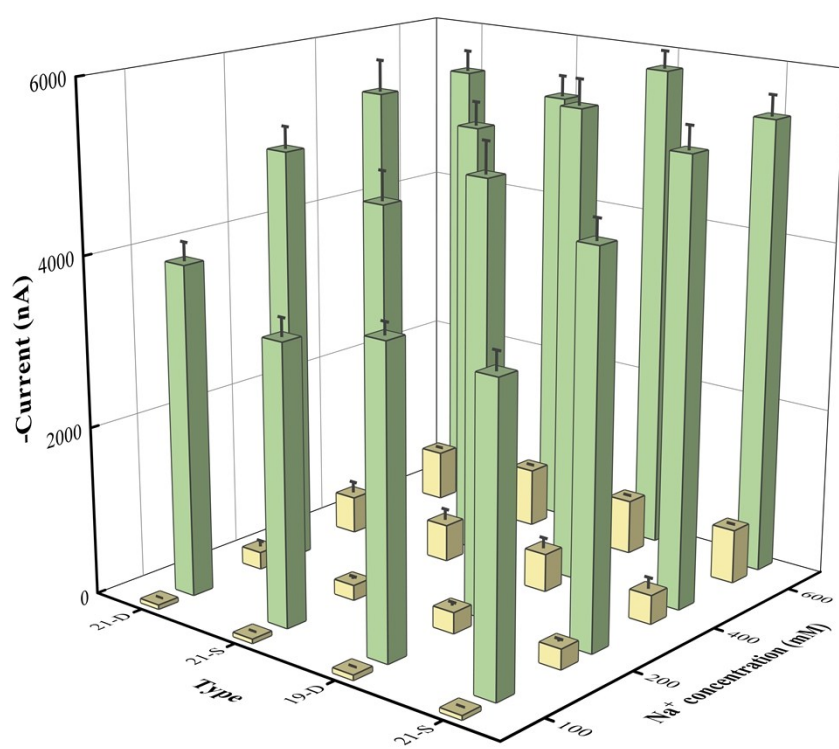

**Figure S2.** Optimal conditions for Na<sup>+</sup> concentration.

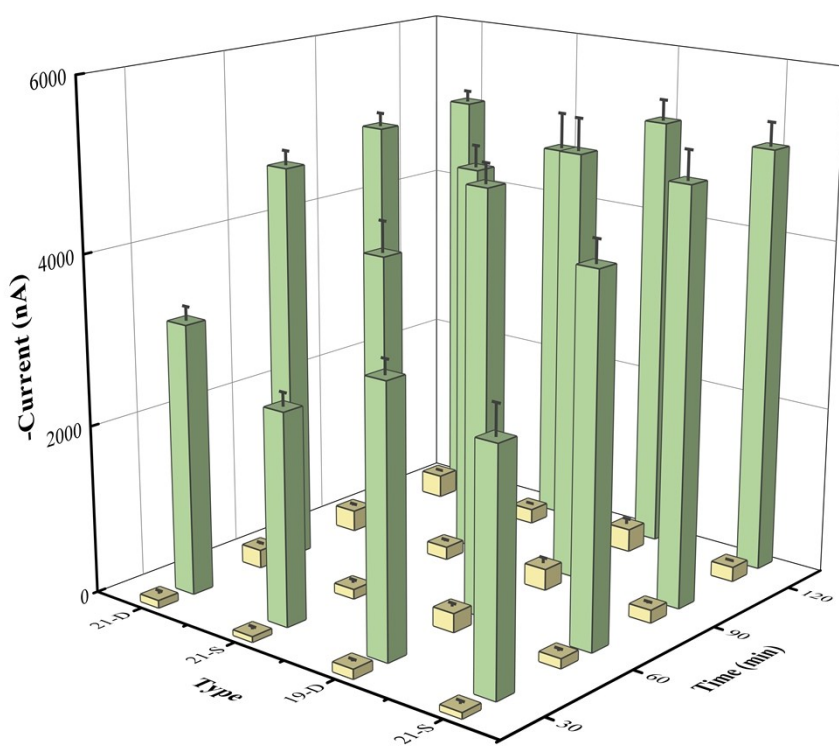

**Figure S3.** Optimal conditions for hybridization time.

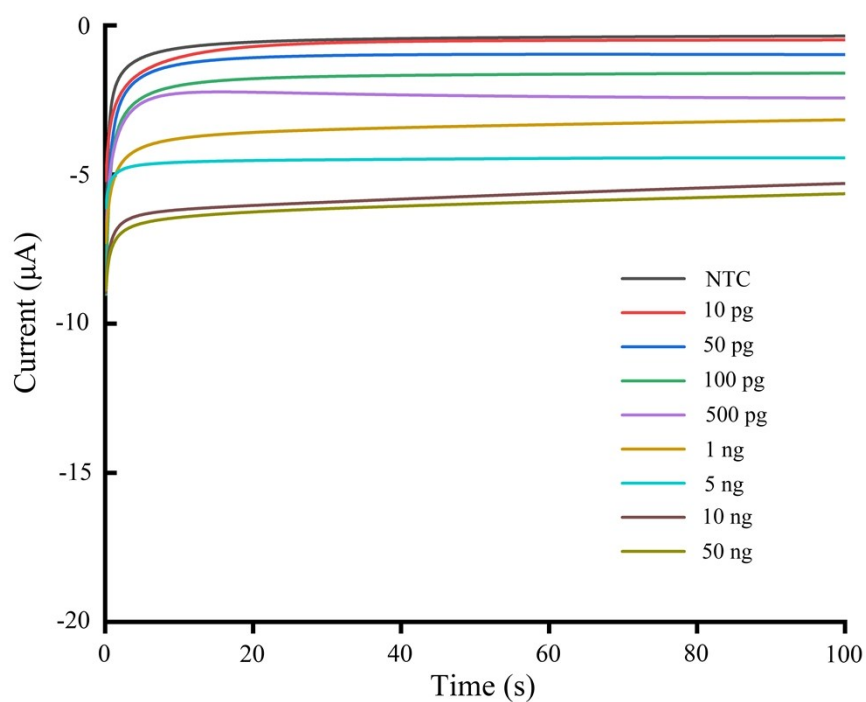

**Figure S4.** Current values of different amount of 19del DNA input. The signal gradually rises as more DNA is added.

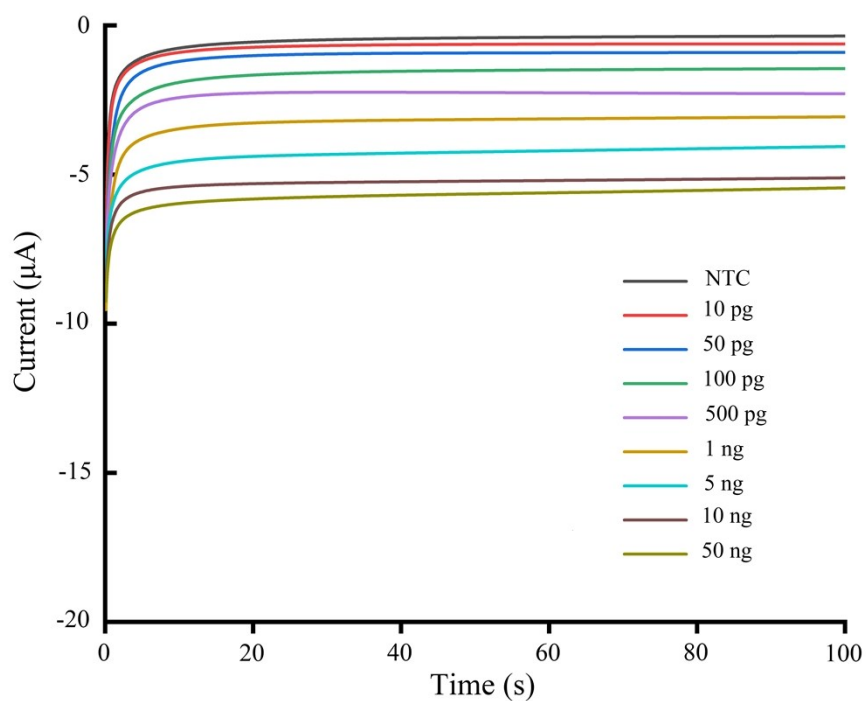

**Figure S5.** Current values of different amount of L858R DNA input. The signal gradually rises as more DNA is added.

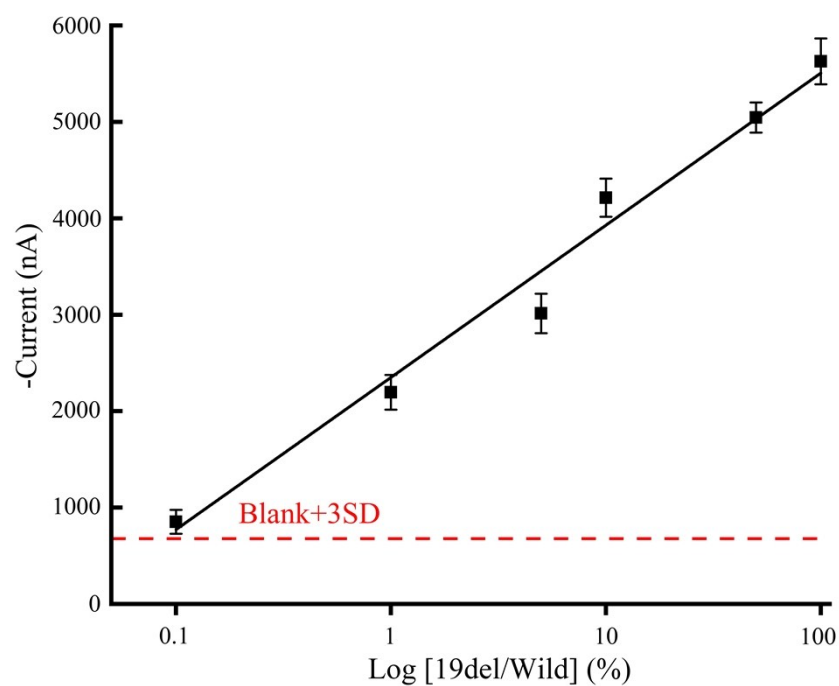

**Figure S6.** Chronoamperometric currents of the different percentages of 19del in the mixture.

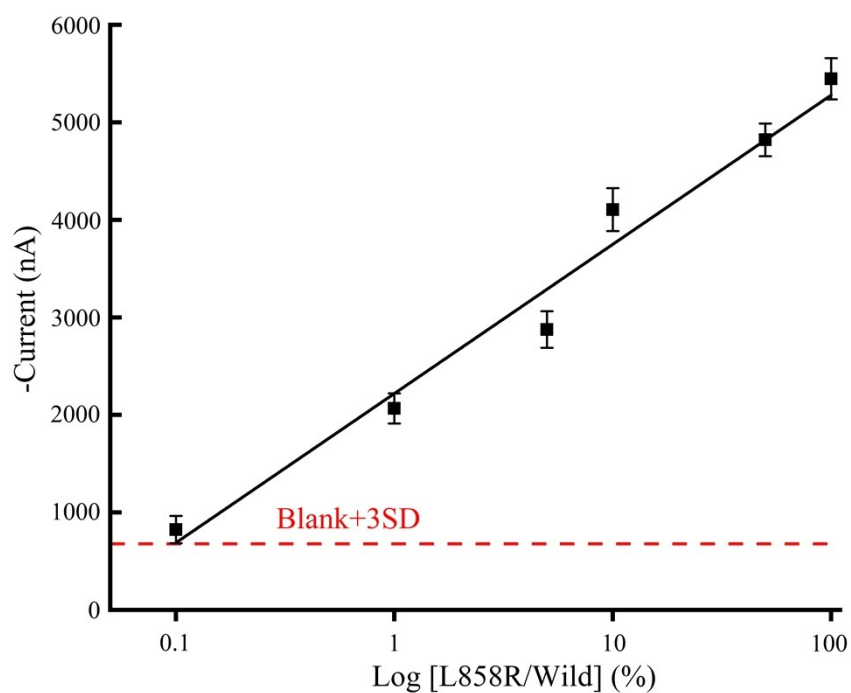

**Figure S7.** Chronoamperometric currents of the different percentages of L858R in the mixture.

**Table S2.** The reproducibility of the platform.

| No.          | 1    | 2    | 3    | SD    | Average | RSD   |
|--------------|------|------|------|-------|---------|-------|
| Current (nA) | 7523 | 7674 | 7390 | 142.1 | 7529    | 1.89% |

**Table S3.** The list of abbreviations in the main text.

| Full phrase                                                                                                       | Abbreviations |
|-------------------------------------------------------------------------------------------------------------------|---------------|
| Non-small cell lung cancer                                                                                        | NSCLC         |
| Epidermal growth factor receptor tyrosine kinase inhibitors                                                       | EGFR-TKIs     |
| Epidermal growth factor receptor                                                                                  | EGFR          |
| Circulating tumor DNA                                                                                             | ctDNA         |
| Next-generation sequencing                                                                                        | NGS           |
| Amplification refractory mutation system                                                                          | ARMS          |
| Droplet digital PCR                                                                                               | dd-PCR        |
| affordable, sensitive, specific, user-friendly, rapid and robust,<br>equipment-free, and deliverable to end-users | ASSURED       |
| Point-of-care testing                                                                                             | POCT          |
| Hybridization chain reaction                                                                                      | HCR           |
| Rolling circle amplification                                                                                      | RCA           |
| Linear-After-The-Exponential                                                                                      | LATE          |
| Single-stranded DNA                                                                                               | ssDNA         |
| Screen-printed electrodes                                                                                         | SPE           |
| 3,3',5,5'-tetramethylbenzidine                                                                                    | TMB           |
| Avidin-horseradish peroxidase                                                                                     | HRP           |
| Cyclic voltammetry                                                                                                | CV            |
| Fetal bovine serum                                                                                                | FBS           |
| Three standard deviations                                                                                         | 3SD           |
| Non-template control                                                                                              | NTC           |
